# Supplementary material for: Amorphous vs. nanocrystalline calcium phosphate as efficient nanocarriers of elicitors in vineyards
Source: Royal Society of Chemistry journal article supplement (doi:10.1039/d3ce00185g), 2023-01-01
Supplement: d3ce00185g1.pdf [file d3ce00185g1.pdf]

## Supplementary information for

# Amorphous or Nanocrystalline Calcium Phosphate as efficient nanocarriers of elicitors in vineyards

Belén Parra-Torrejón,<sup>a</sup> Marta Salvachúa-de la Fuente,<sup>a</sup> Maria J. Giménez-Bañón,<sup>b</sup> Juan D. Moreno-Olivares,<sup>b</sup> Diego F. Paladines-Quezada,<sup>b</sup> Juan A. Bleda-Sánchez,<sup>b</sup> Rocío Gil-Muñoz,<sup>b</sup> Gloria B. Ramírez-Rodríguez<sup>\*a</sup> and José M. Delgado-López<sup>\*a</sup>

<sup>a</sup> Department of Inorganic Chemistry, Faculty of Science, University of Granada, (Granada) Spain.

<sup>b</sup> Instituto Murciano de Investigación y Desarrollo Agrario y Medioambiental. Calle Mayor s/n. La Alberca (Murcia) Spain.

(\*) Authors to whom any correspondence should be addressed: J.M.D.-L. ([jmdl@ugr.es](mailto:jmdl@ugr.es)); G.B.R.-R. ([gloria@ugr.es](mailto:gloria@ugr.es))

### Table of contents

#### S1. Rietveld analysis of the diffraction patterns

#### S2. X-ray photoelectron spectroscopy

#### Figures S1 to S4

#### Table S1 and S2

#### References

#### S1. Rietveld analysis of the diffraction patterns

Diffraction patterns of nanocrystalline materials were analyzed using the Materials Analysis Using Diffraction (MAUD) software.<sup>1</sup> Instrumental line broadening was determined by measuring the pattern of the standard LaB<sub>6</sub>, using the same conditions and collection parameters. A diffractogram of ACP was used as background. Scale factor and unit cell parameters ( $a$  and  $c$ ) were refined. Other atomic thermal parameters, site occupancy factors and atomic position were maintained fixed. The anisotropic crystallite-size and microstrain contributions to line broadening were determined by the POPA model implemented in MAUD. Crystallite size of the 002 and 300 reflections were used as approximation of the length ( $L_{002}$ ) and width ( $D_{300}$ ) of the nanocrystals, respectively, and compared with the size measurements from TEM (Table S1).

## S2. X-ray photoelectron spectroscopy

The surface of Ap and Ap-MeJ NPs has been analysed by X-ray photoelectron spectroscopy (XPS) to evaluate its composition before and after MeJ adsorption. XPS spectra were acquired on a Kratos Axis Ultra-DLD (CIC-UGR) using monochromatic Al-K $\alpha$  radiation.

## Figures

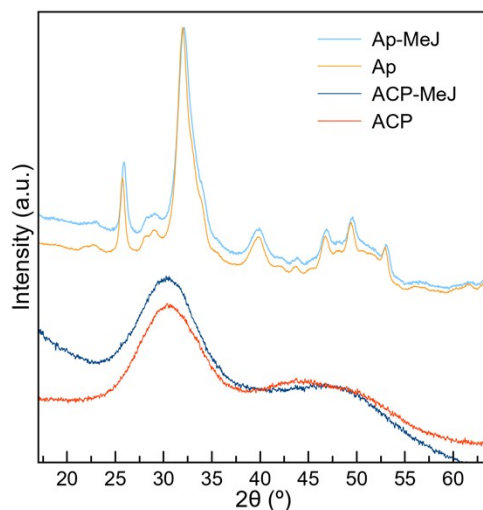

**Figure S1.** XRD patterns of ACP, ACP-MeJ, Ap and Ap-MeJ powdered samples.

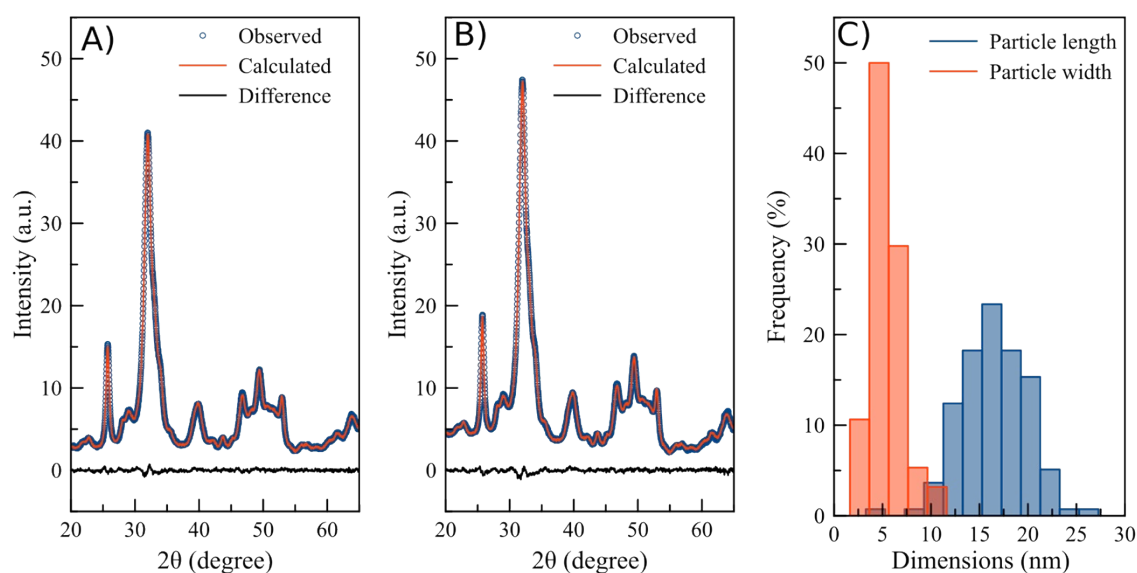

**Figure S2.** (A,B) Rietveld refinement of the diffraction patterns collected for Ap (A) and Ap-MeJ (B). (C) Histograms of the Ap-MeJ nanoparticles length and width as measured from TEM imaging (100 particles were measured).

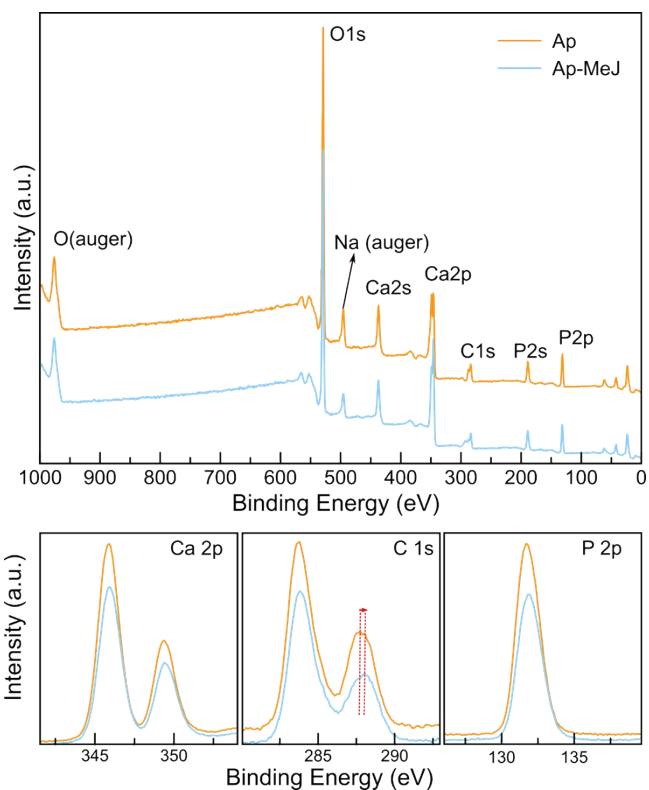

**Figure S3.** The XPS survey spectra of Ap and Ap-MeJ NPs. High-resolution XPS spectra of Ap and Ap-MeJ focusing on the P 2p, C 1s and Ca 2p peaks.

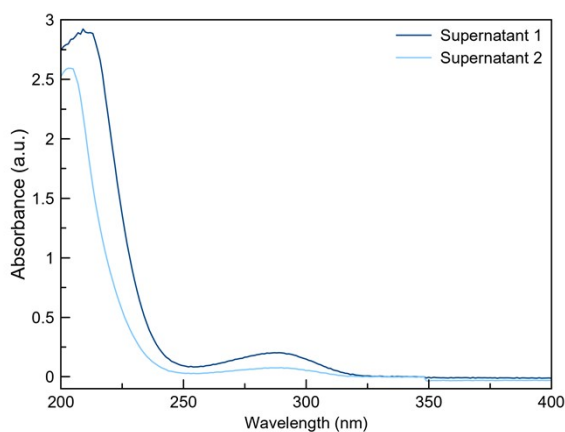

**Figure S4.** UV-Vis spectra of the supernatants collected after 72 hours of delivery in water (supernatant 1) and a second cycle of delivery in water (supernatant 2). The band centred at 291 nm is due to the absorption of MeJ.

## Tables

**Table S1.** Crystallite size (from Rietveld refinements) and particle size (from TEM imaging) of Ap (before adsorption) and Ap-MeJ (after adsorption).

|        | Crystal Size (nm)    |                     | Particle size (nm) |               |
|--------|----------------------|---------------------|--------------------|---------------|
|        | Length ( $L_{002}$ ) | Width ( $D_{300}$ ) | Length             | Width         |
| Ap     | 20.5                 | 7.8                 | $17.6 \pm 2.9$     | $4.7 \pm 0.9$ |
| Ap-MeJ | 20.2                 | 8.0                 | $16.5 \pm 3.3$     | $5.5 \pm 1.6$ |

**Table S2.** Surface charge of ACP and Ap (Ap and Ap\* with modified surface) before and after MeJ adsorption. MeJ loading capacity of ACP-MeJ, Ap-MeJ and Ap\*-MeJ estimated by UV-Vis spectroscopy.

| Sample                 | $\zeta$ -potential (mV) |                 | Loading (%wt)  |
|------------------------|-------------------------|-----------------|----------------|
|                        | Before                  | After           |                |
| ACP-MeJ                | $-10.53 \pm 0.08$       | $-6.2 \pm 1.0$  | $10.6 \pm 0.5$ |
| Ap-MeJ                 | $-21.6 \pm 0.2$         | $-16.4 \pm 2.2$ | $4.5 \pm 1.1$  |
| Ap*-MeJ <sup>(a)</sup> | $-0.7 \pm 0.2$          | $-1.8 \pm 1.1$  | $6.9 \pm 0.4$  |

<sup>(a)</sup> Ap-NPs were immersed in a sodium hydroxide solution (1M) for 1 hour to remove citrate molecules from Ap surface and obtain Ap\* NPs with less negative surface charge.

## References

- (1) Lutterotti, L. Total Pattern Fitting for the Combined Size–Strain–Stress–Texture Determination in Thin Film Diffraction. *Nucl. Instruments Methods Phys. Res. Sect. B Beam Interact. with Mater. Atoms* **2010**, *268* (3), 334–340.
